# Supplementary material
Source: PubMed Central journal article supplement (PMC5465903)
Supplement: pnas.1620631114.sapp.pdf [file pnas.1620631114.sapp.pdf]

### Supplementary Figure Legends

**Figure S1. *Rad51* mutant fish are all infertile males.** (A) H&E stained histological sections of 4 mpf wild type and mutant kidneys using a 20X objective. The arrow points out the area where mature spermatozoa reside. Scale bar=100  $\mu$ m. (B) Capillaries used to obtain sperm from wild type and mutant fish. Numbers indicate the number of fish giving sperm among the fish tested. Two-tailed Fisher's exact test,  $P=.0002$ .  $+/+$ ,  $n=9$ .  $-/-$   $n=13$ .

**Figure S2. Loss of *rad51* causes DNA damage sensitivity.** (A) Chromosome spreads of 24 hpf wild type and mutant embryos treated with 5  $\mu$ g/ml mitomycin C for 20 hours. White arrows indicate premature chromatid separation events (i). Quantification of the damage (ii). Mann-Whitney test,  $P=.001$ ,  $n_{+/+}=16$ ,  $n_{-/-}=19$ . (B) Chromosome spreads of 24 hpf wild type and mutant embryos treated with 1 nM CPT for 20 hours. White arrows indicate breaks and radial structures in response to topoisomerase inhibition (i). Quantification of the damage (ii). Mann-Whitney test,  $P<.0001$ ,  $n_{+/+}=12$ ,  $n_{-/-}=17$ . (C) Chromosome spreads of 24 hpf wild type and mutant embryos treated with 10  $\mu$   $\mu$ M DiQ for 20 hours (i). Quantification of the damage (ii). Mann-Whitney test,  $P=.13$ ,  $n_{+/+}=14$ ,  $n_{-/-}=29$ . Bars represent mean  $\pm$  SEM in all graphs.

**Figure S3. NHEJ inhibition does not lead to synthetic lethality in *rad51* mutants.** Morphology of 24 hpf embryos treated with varying concentrations of SCR-7 for 20 hours.

**Figure S4. *Rad51* mutant fish are smaller than their wild type siblings.** (A) Representative images of mutant and wt fish at 23 dpf (i). (ii) Graph showing difference in size between the genotypes. Two-sided Student's t-test ( $P=.0016$ ),  $n_{+/+}=11$ ,  $n_{-/-}=7$ . Scale bar=1 mm. (B) Comparison of mutant and wild type fish at 4 mpf. Two-sided Student's t-test ( $P=.004$ ),  $n_{+/+}=28$ ,  $n_{-/-}=19$ . Scale bar=1 cm. (C) (i) Representative images of mutant and wt fish at 8 mpf. (ii) Graph showing difference in size between the genotypes. Two-sided Student's t-test ( $P=.023$ ),  $n_{+/+}=29$ ,  $n_{-/-}=31$ . Scale bar=1 cm. Bars represent mean  $\pm$  SEM in all graphs.

**Figure S5. *Rad51* mutants develop microphthalmia.** (A) Eye size at 5 dpf. Two-sided Student's t-test ( $P=.0001$ ),  $n_{+/+}=21$ ,  $n_{-/-}=13$ . (B) Eye size at 23 dpf. Two-sided Student's t-test ( $P=.013$ ),  $n_{+/+}=11$ ,  $n_{-/-}=7$ .

**Figure S6. FACS gating.** (A) Gate selecting for: (i) cells and excluding debris, (ii) singlets, (iii) and (iv) viable cells based on propidium-iodide staining. (B) Gating for apoptotic cells using AnnexinV-GFP (AV-GFP) antibody and PI staining. (i) Gating set on an unstained control, (ii) gating on an AV-GFP and PI-stained control. Viable cells are in the bottom left, apoptotic cells in the top left, dead cells in the top right and necrotic cells in the bottom right. (C) Gating for *gata1*:GFP-positive cells. (i) Gating set on a non-transgenic fish, (ii) same gating on a transgenic fish. (D) Gating for *cd41*:GFP-positive cells. (i) Gating set on a non-transgenic fish, (ii) same gating on a transgenic fish, (iii) GFP+ cells are split into GFP<sup>dim</sup> (thrombocytic progenitors) and GFP<sup>high</sup> (mature thrombocytes) by selecting for two equally-sized gates at the 50% fluorescence mark. (E) Gating for different cell lineages based on the FSC and SSC parameters. (F) Gating for BrdU+ cells on fixed cells. (i) Selection for cells, (ii) singlets, (iii) BrdU+ cells, (iv) same gating as in iii, but on a BrdU-injected sample.

**Figure S7. P53 co-mutation increases the incidence of tumor development in double mutant fish, but does not rescue their fertility or size.** (A) Male and female *p53*<sup>-/-</sup> *rad51*<sup>-/-</sup> fish at 4 mpf. (B) H&E stained histological sections of 4 mpf *p53*<sup>-/-</sup> and *p53*<sup>-/-</sup> *rad51*<sup>-/-</sup> ovaries using a 10X objective. Oocytes of different maturation stages are apparent in both genotypes. Scale bar=100µm. (C) H&E stained histological sections of 4 mpf *p53*<sup>-/-</sup> and *p53*<sup>-/-</sup> *rad51*<sup>-/-</sup> testes using a 20X objective. Arrows indicate normal location of mature spermatozoa Scale bar=100µm. (D) Quantification of the size of wild type and *p53*<sup>-/-</sup> *rad51*<sup>-/-</sup> fish at 4 mpf. Two-tailed Student's t-test,  $P=.008$ ,  $n_{p53+/+ rad51+/+}=27$ ,  $n_{p53-/- rad51-/-}=9$ . (E) 5-month-old *p53*<sup>-/-</sup> *rad51*<sup>-/-</sup> fish with tumor behind the eye (top). Accompanying H&E stained histological sections of the tumor (bottom) using 2.5 and 63X objectives. Scale bar=500 µm and 10 µm respectively. (F) (i) and (ii) Tumors observed in 8 mpf female *p53*<sup>-/-</sup> *rad51*<sup>-/-</sup> fish in the body cavity around the ovarian tissue. Scale bar=500 µm and 10 µm respectively. Overall, 3/9 aged double mutants showed tumors.

**Figure S8. Inflammation marker gene expression** (A) Wt fish show increased inflammation markers *il1b* (i) and *il8* (ii) six hours post injection. +/+, n=6. -/-, n=6. Two sided Student's t-test,  $P=.009$  (i) and  $P=.015$  (ii). (B) There is no difference in expression between wt and mutant fish in *il1b* (i) and *il8* (ii). +/+, n=6. -/- n=6. Two sided Student's t-test. (C) Relative expression of monocyte/macrophage markers *marco* (i) and *csf1r* (ii) in response to four pl:pC injections in wt fish. Two-sided Student's t-test,  $P<.0001$  (i) and  $P=.0002$  (ii),  $n_{NI}=10$ ,  $n_I=9$ . Bars represent geometric mean + 95% confidence interval (CI). NI=non-injected, I=injected. (D) Injection

scheme for determining cell proliferation in pl:pC injected fish. The experiment was started with a cohort of 36 wt and 18 mutant fish. 12 wt were injected with PBS, 12 with pl:pC, 6 with PBS+BrdU and 6 with pl:pC+BrdU. 12 mutants were injected with pl:pC and 6 with pl:pC+BrdU. On the next day, the BrdU co-injected fish were culled and analysed. On day 7, 6 wt were injected with PBS, 6 with pl:pC, 6 with PBS+BrdU and 6 with pl:pC+BrdU. 6 mutants were injected with pl:pC and 6 with pl:pC+BrdU. On the next day, the BrdU co-injected fish were culled and analysed. On day 14, 6 wt fish were injected with PBS and 6 with pl:pC. 6 mutants were injected with pl:pC. On day 21, the same fish were injected again with the same substances and BrdU. All remaining fish were culled the next day and analysed.

**Figure S9: Mutation in *rad51* does not lead to acetaldehyde sensitivity**

(A) Schematic of the experimental design. Both wild type and *rad51*<sup>-/-</sup> fish were injected every seven days with 10 µl 1% acetaldehyde, four injections in total. All fish were culled 3 days after the last injection. Control fish were not injected; *Rad51*<sup>+/+</sup>,  $n_{\text{non-injected}}=9$ ,  $n_{\text{injected}}=8$ ; *rad51*<sup>-/-</sup>,  $n_{\text{non-injected}}=10$ ,  $n_{\text{injected}}=9$ . (B) Absolute number of cells belonging to different blood lineages in the kidney gained by combining FACS data with the cell counts shown in A. Statistical tests were carried out individually for each cell type, using two-way ANOVA. *P*-value shown on the graph stems from a *post-hoc* Šidak multiple comparison test, comparing non-injected to injected fish within each genotype. For all groups, *n* is the same as in A. (C) The total number of cells in the kidney in injected and non-injected fish. Statistical testing was carried out using two-way ANOVA. There was a statistically significant effect of mutation status ( $F(1,32)=91.2$ ,  $P<.0001$ ) and of injection status ( $F(1,32)=12.29$ ,  $P=.0014$ ), as well as the interaction between the two ( $F(1,32)=18.49$ ,  $P=.0001$ ). *P*-value shown on the graph is from a *post-hoc* Tukey multiple comparison test. For all groups, *n* is the same as in A. (D) Viable cells as determined by PI-staining. Two-way ANOVA revealed a significant influence of mutation status ( $F(1,32)=27.47$ ,  $P<.0001$ ), as well as injection status ( $F(1,32)=35.28$ ,  $P<.0001$ ). *P*-values on the graph stem from a *post-hoc* Tukey multiple comparison test. Bars represent mean  $\pm$  SEM in B, C and D. (E) Relative gene expression of *p53*. Two-way ANOVA revealed a significant influence of mutation status ( $F(1,32)=16.67$ ,  $P=.0003$ ). Bars represent geometric mean + 95% CI.

**Table S1. Antibodies used for western blotting and immunostaining.**

**Table S2. Primers used for qPCR.**

**Table S3. Full data on ISH staining in Figure 5A.**

**Supplementary References**

1. Kyritsis N, Kizil C, Zocher S, et al. Acute inflammation initiates the regenerative response in the adult zebrafish brain. *Science*. 2012;338(6112):1353–1356.
2. Wittamer V, Bertrand JY, Gutschow PW, Traver D. Characterization of the mononuclear phagocyte system in zebrafish. *Blood*. 2011;117(26):7126–7135.

# Figure S1

## A

Testis 4 mpf

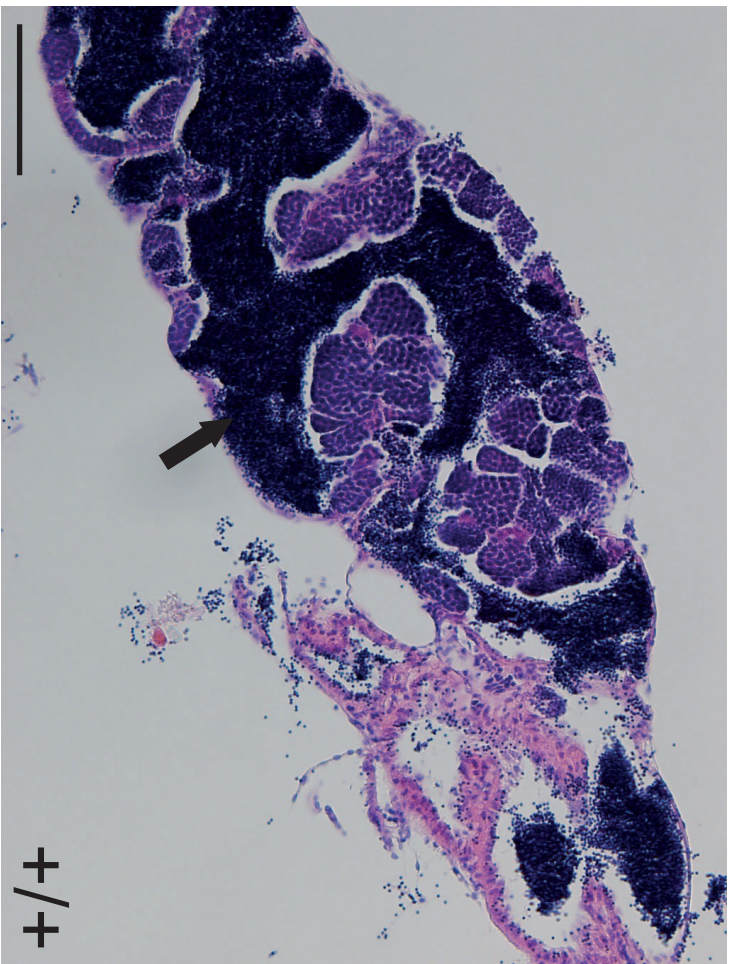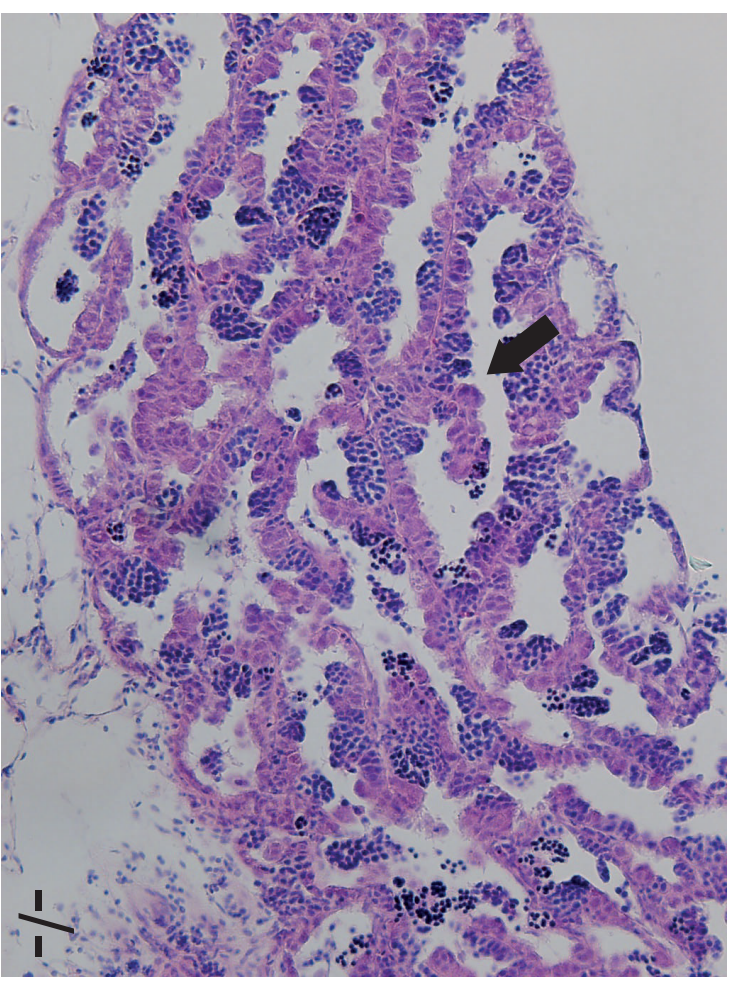

## B

Sperm capillaries 4 mpf

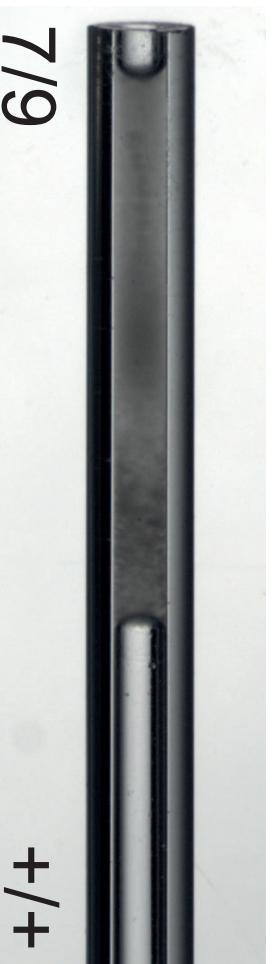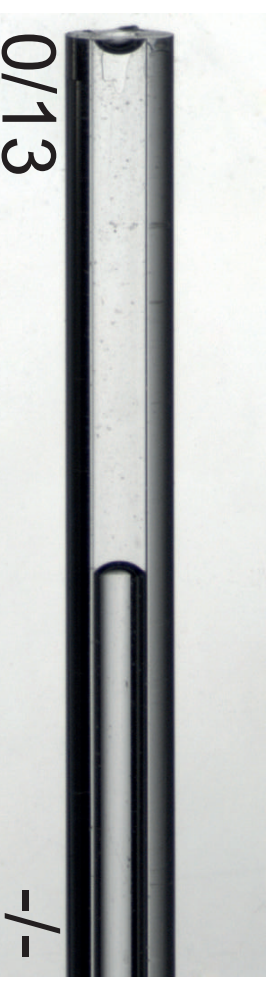

# Figure S2

## A<sub>i</sub>

MMC 24 hpf

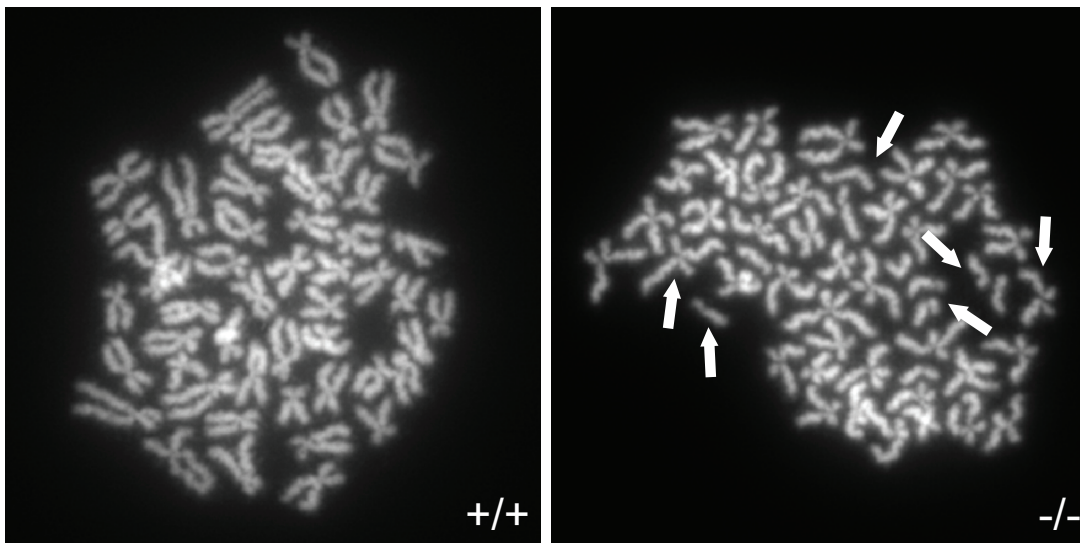

## ii

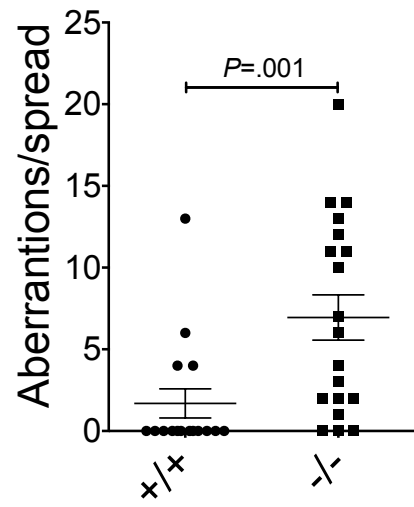

## B<sub>i</sub>

CPT 24 hpf

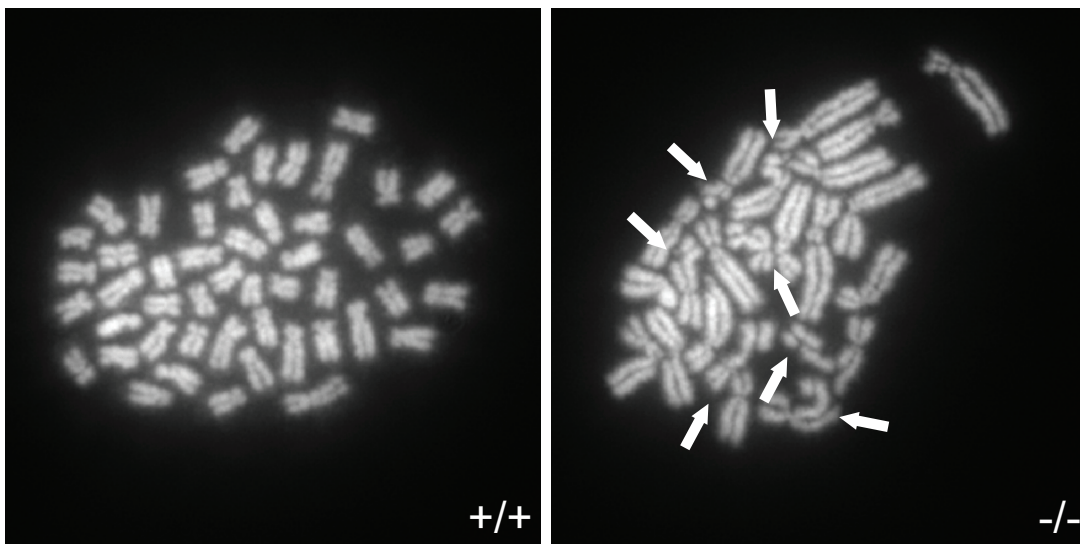

## ii

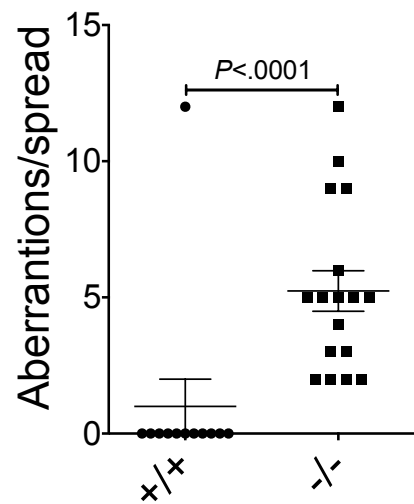

## C<sub>i</sub>

DiQ 24 hpf

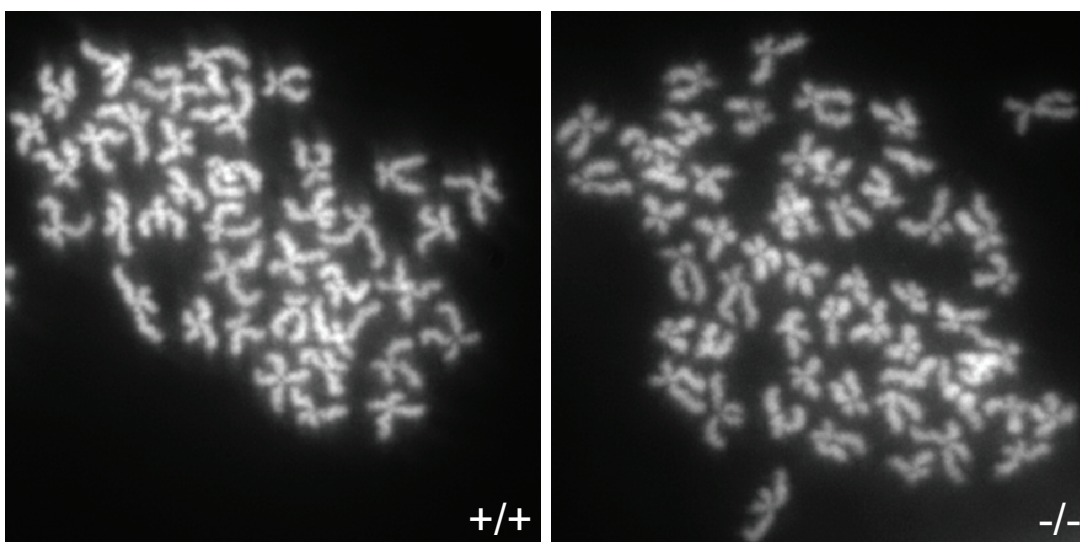

## ii

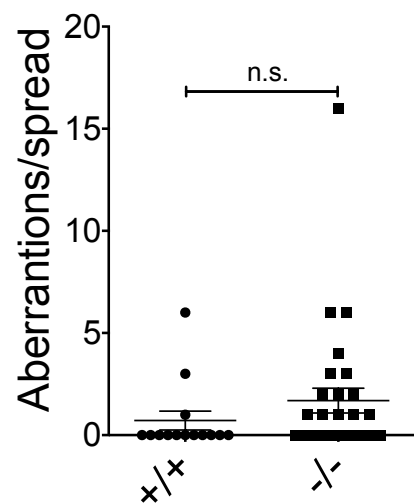

# Figure S3

Unreated

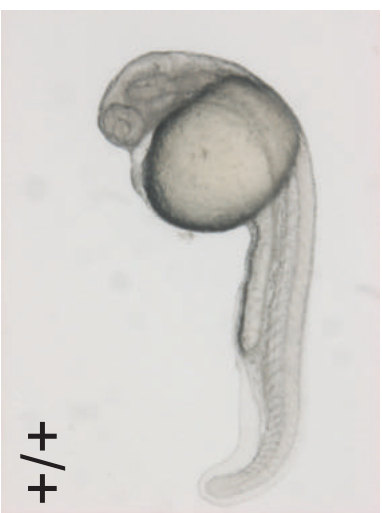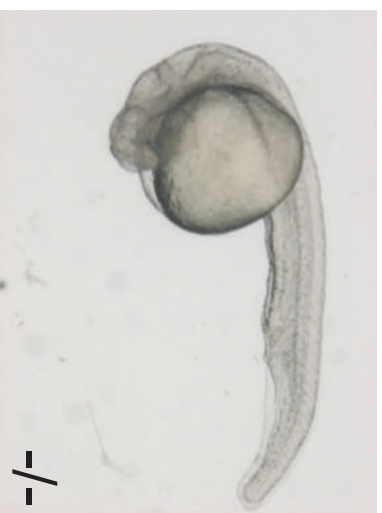

10  $\mu$ M SCR-7

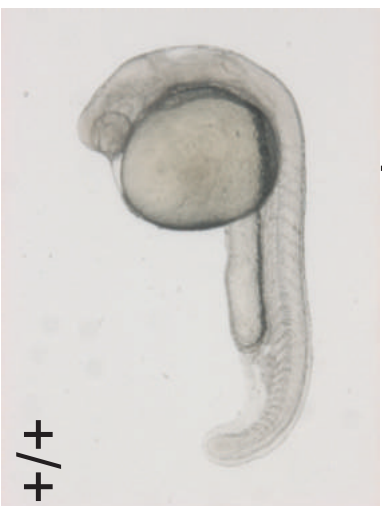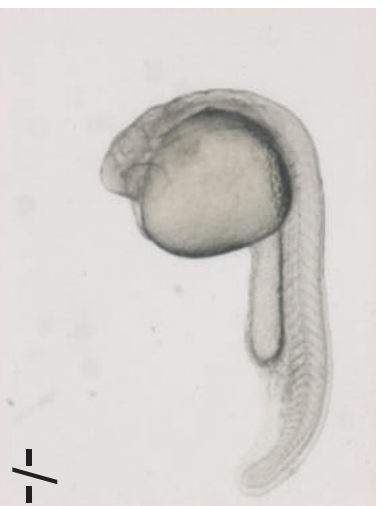

25  $\mu$ M SCR-7

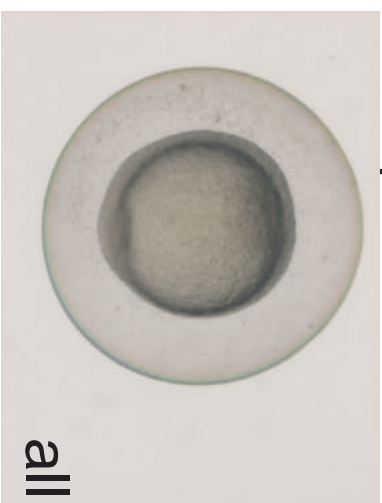

75  $\mu$ M SCR-7

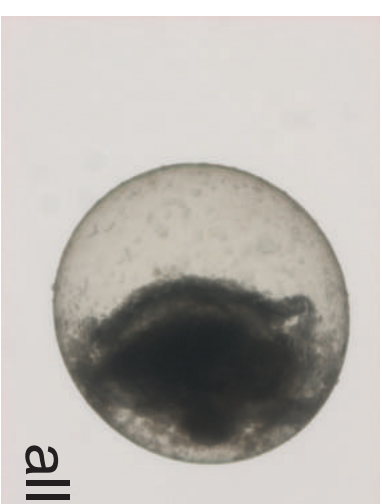

# Figure S4

**A**

**i**

23 dpf

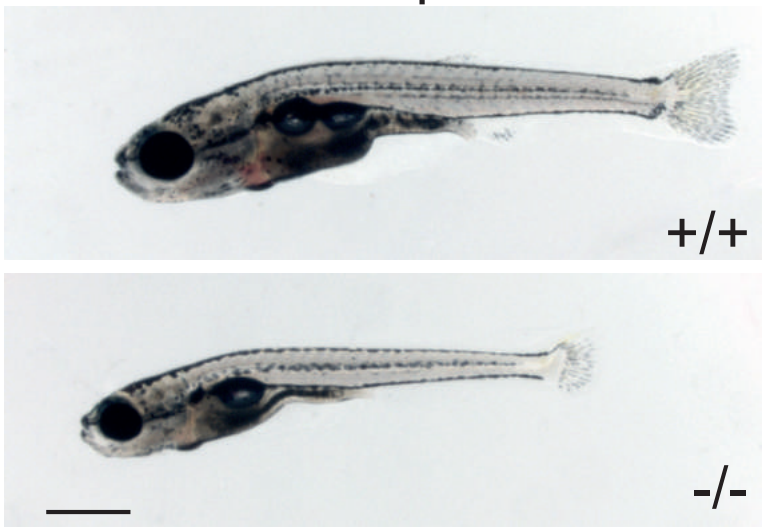

**ii**

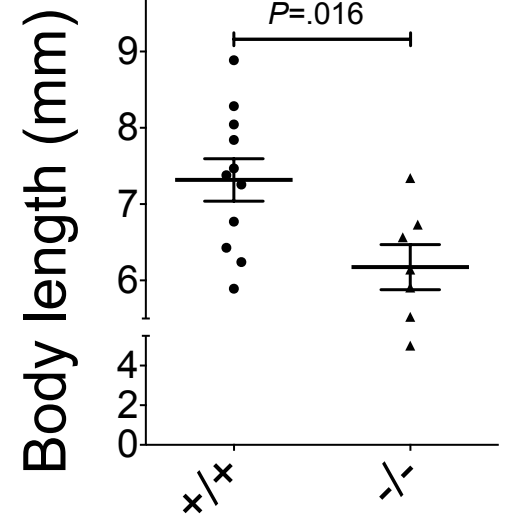

**B**

**i**

4 mpf

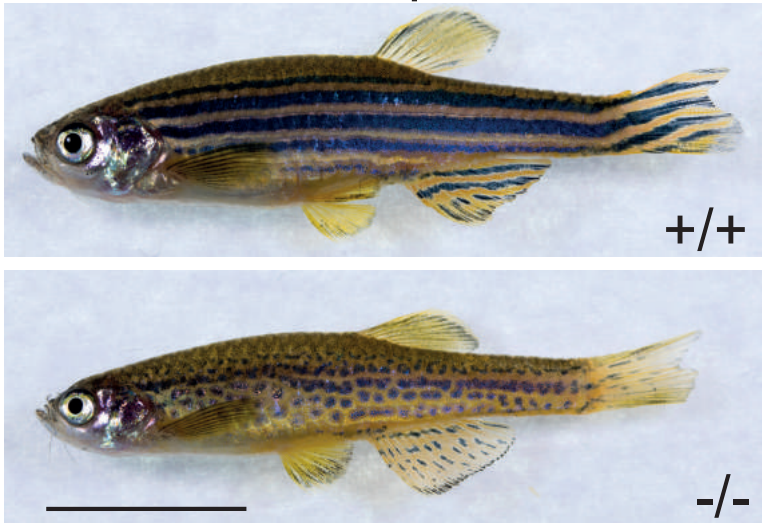

**ii**

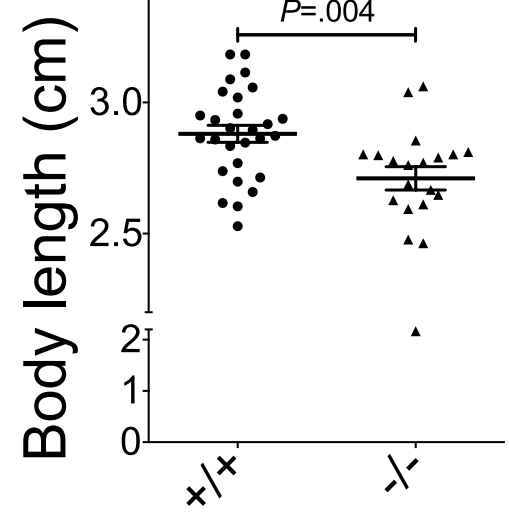

**C**

**i**

8 mpf

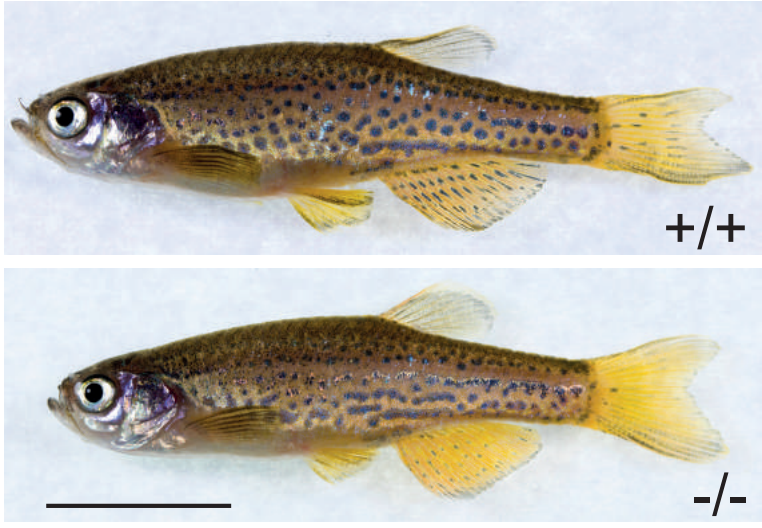

**ii**

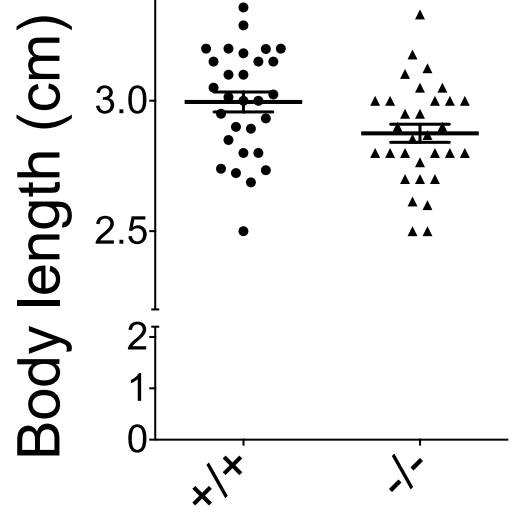



# Figure S5

## A

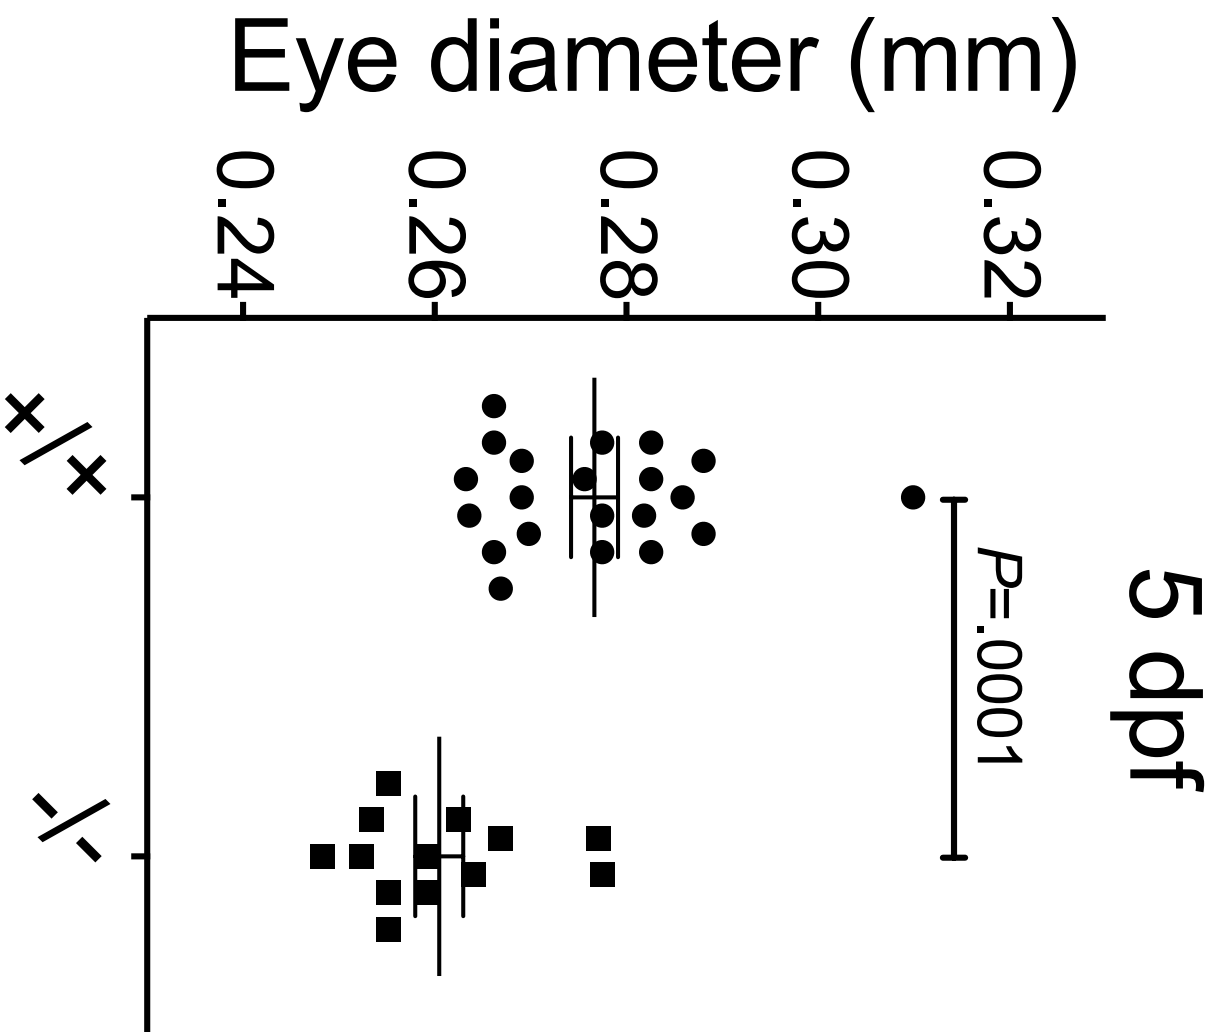

## B

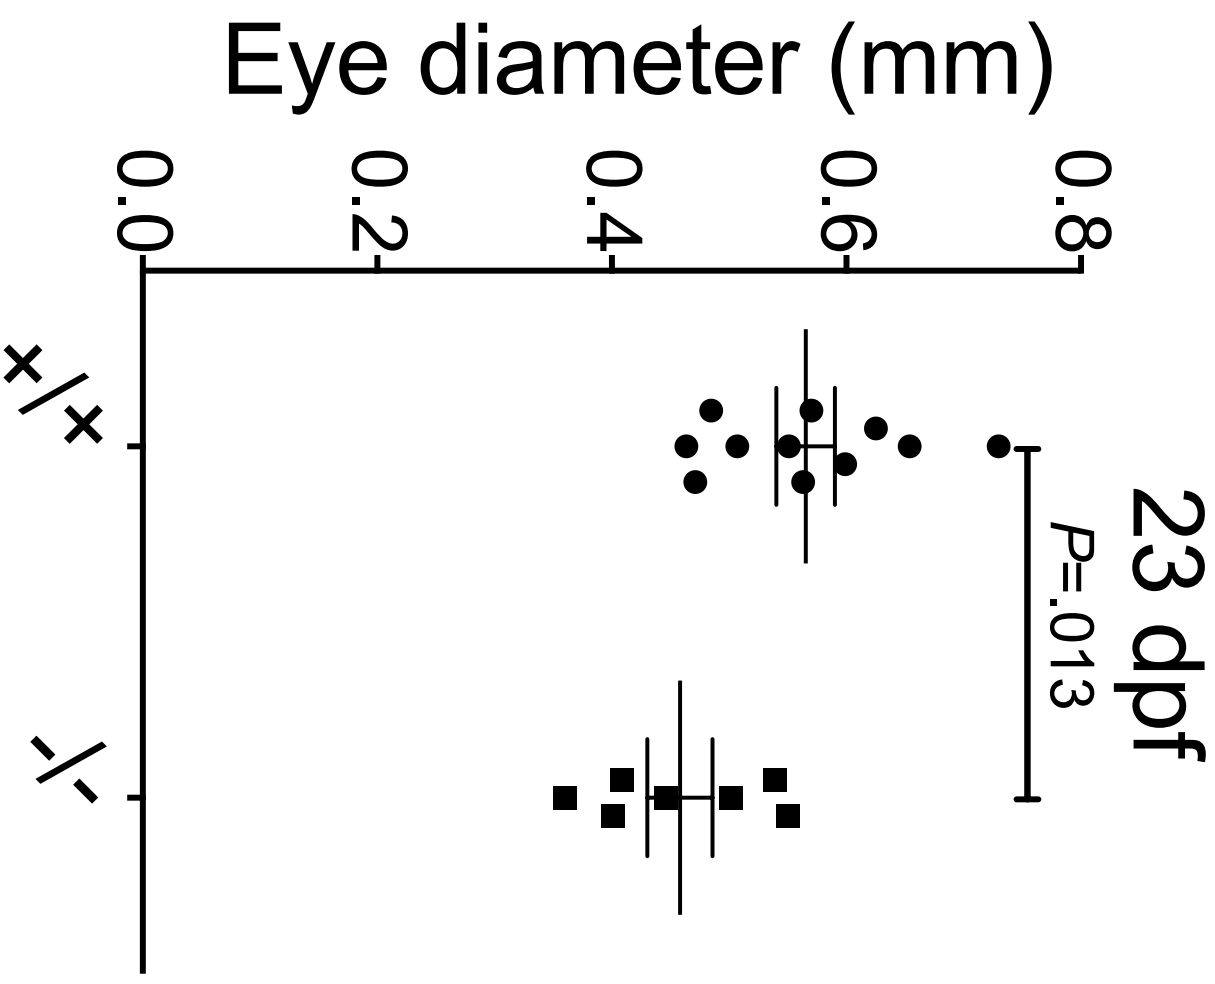

**Figure S6**

**A**

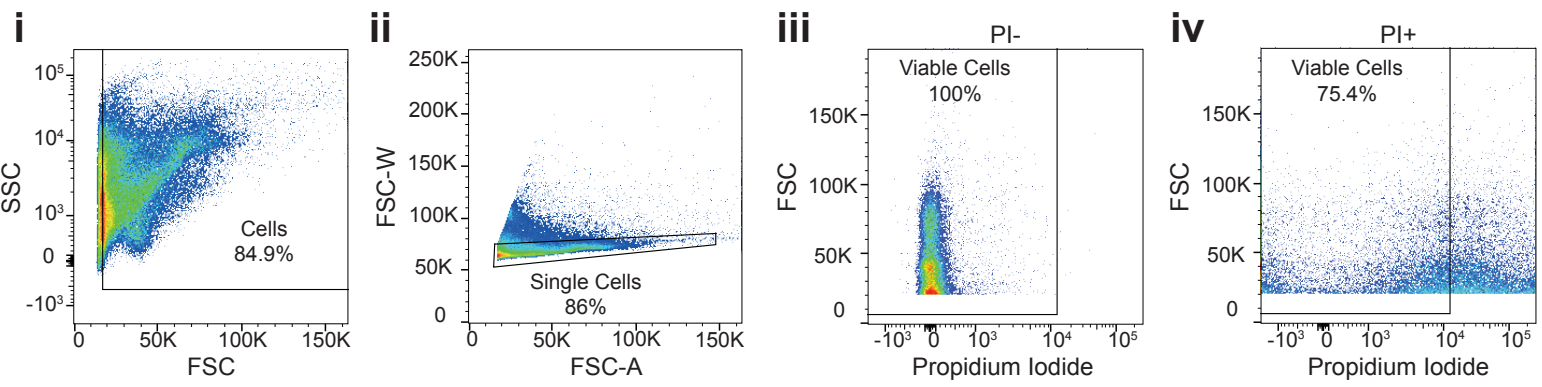

**B**

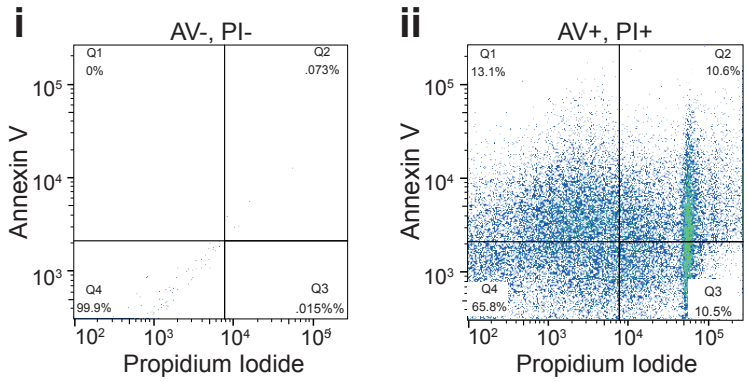

**C**

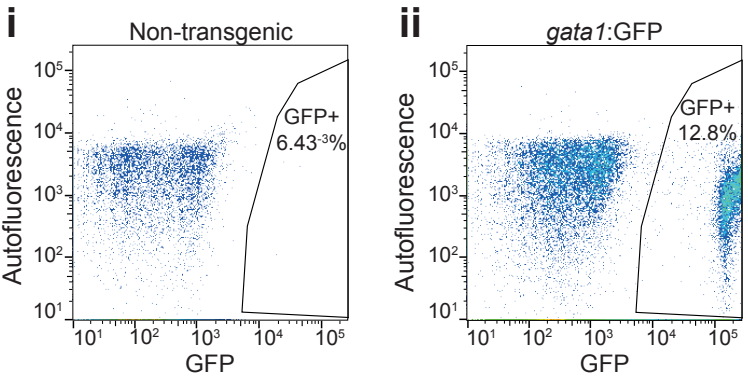

**D**

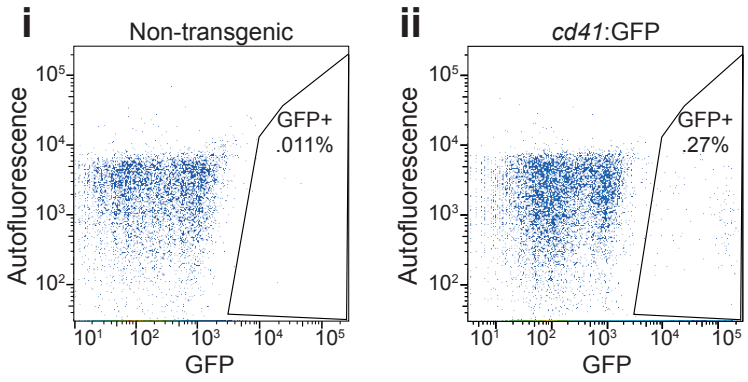

**iii**

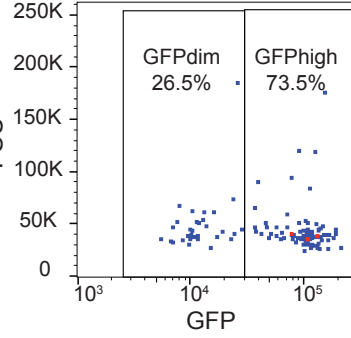

**E**

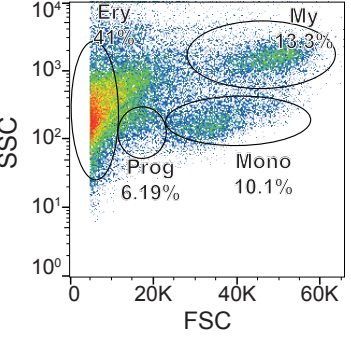

**F**

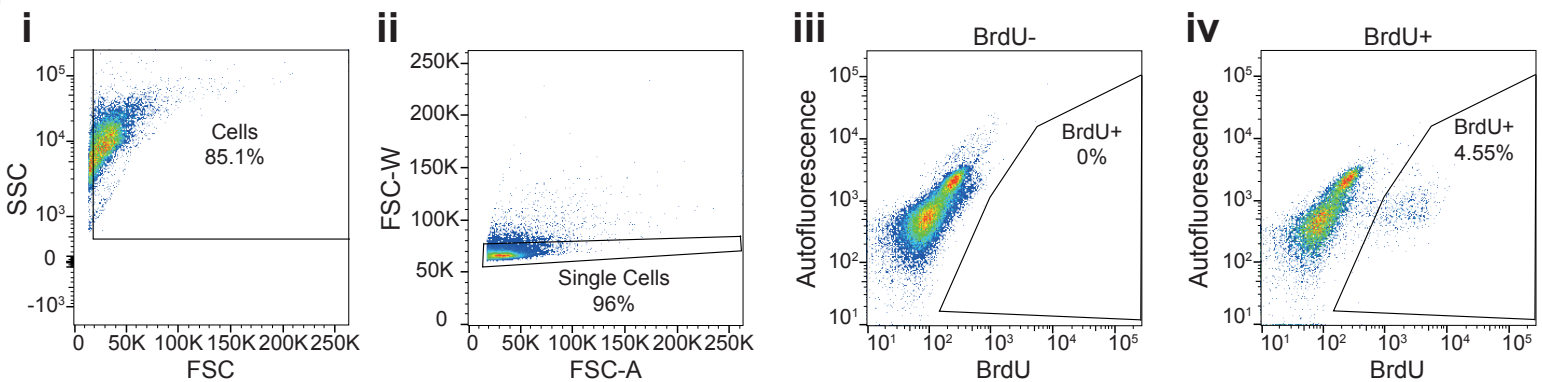

**Figure S7**

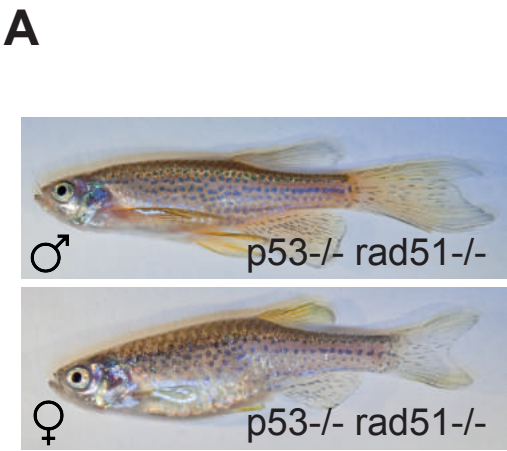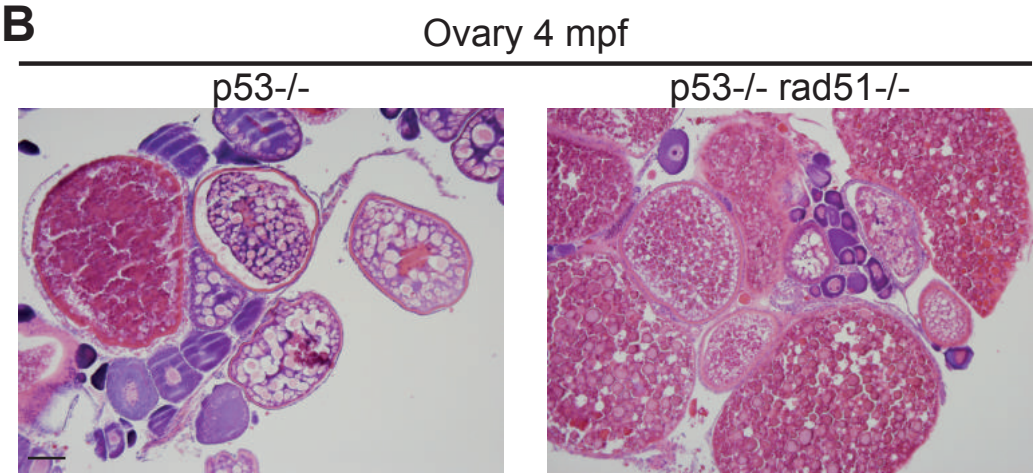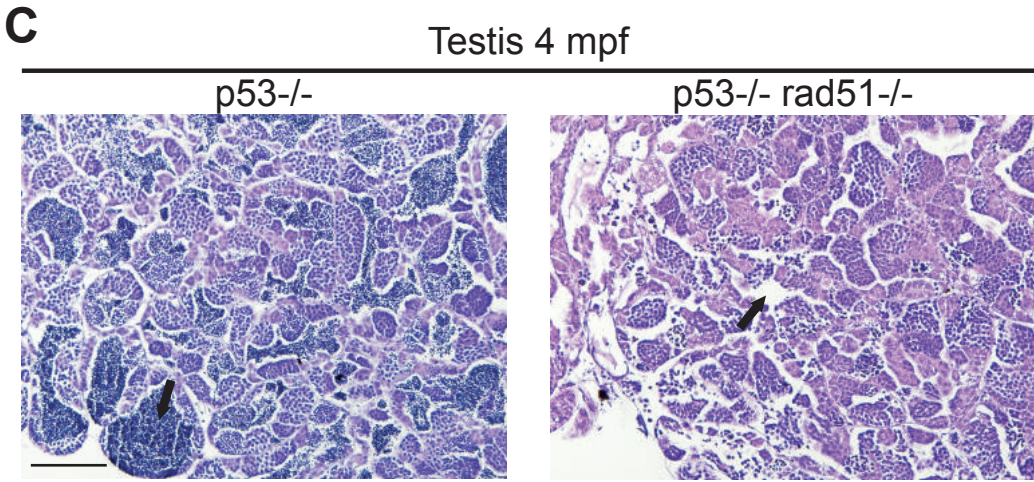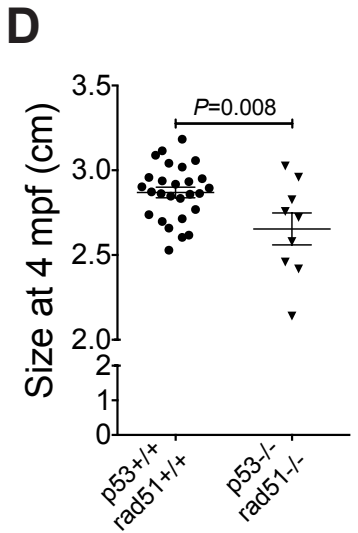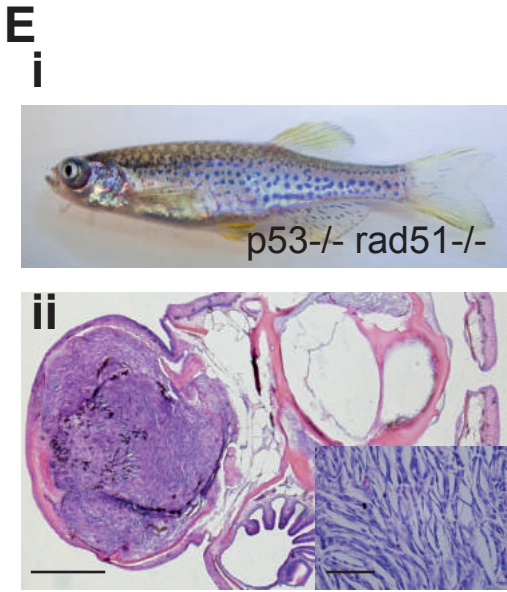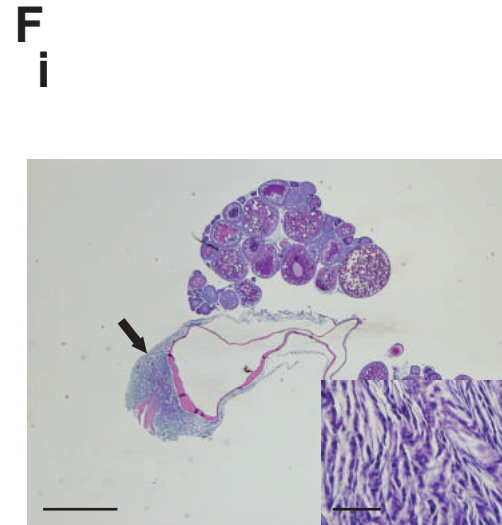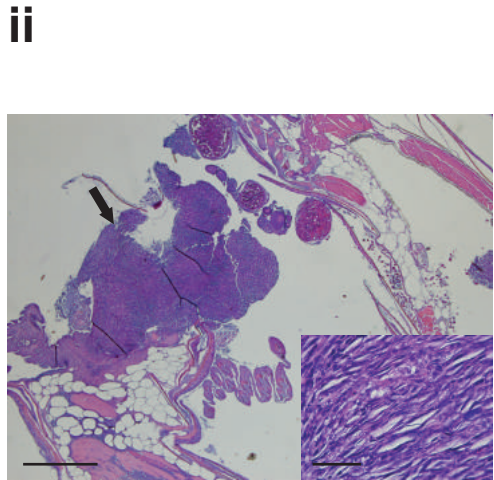

**Figure S8**

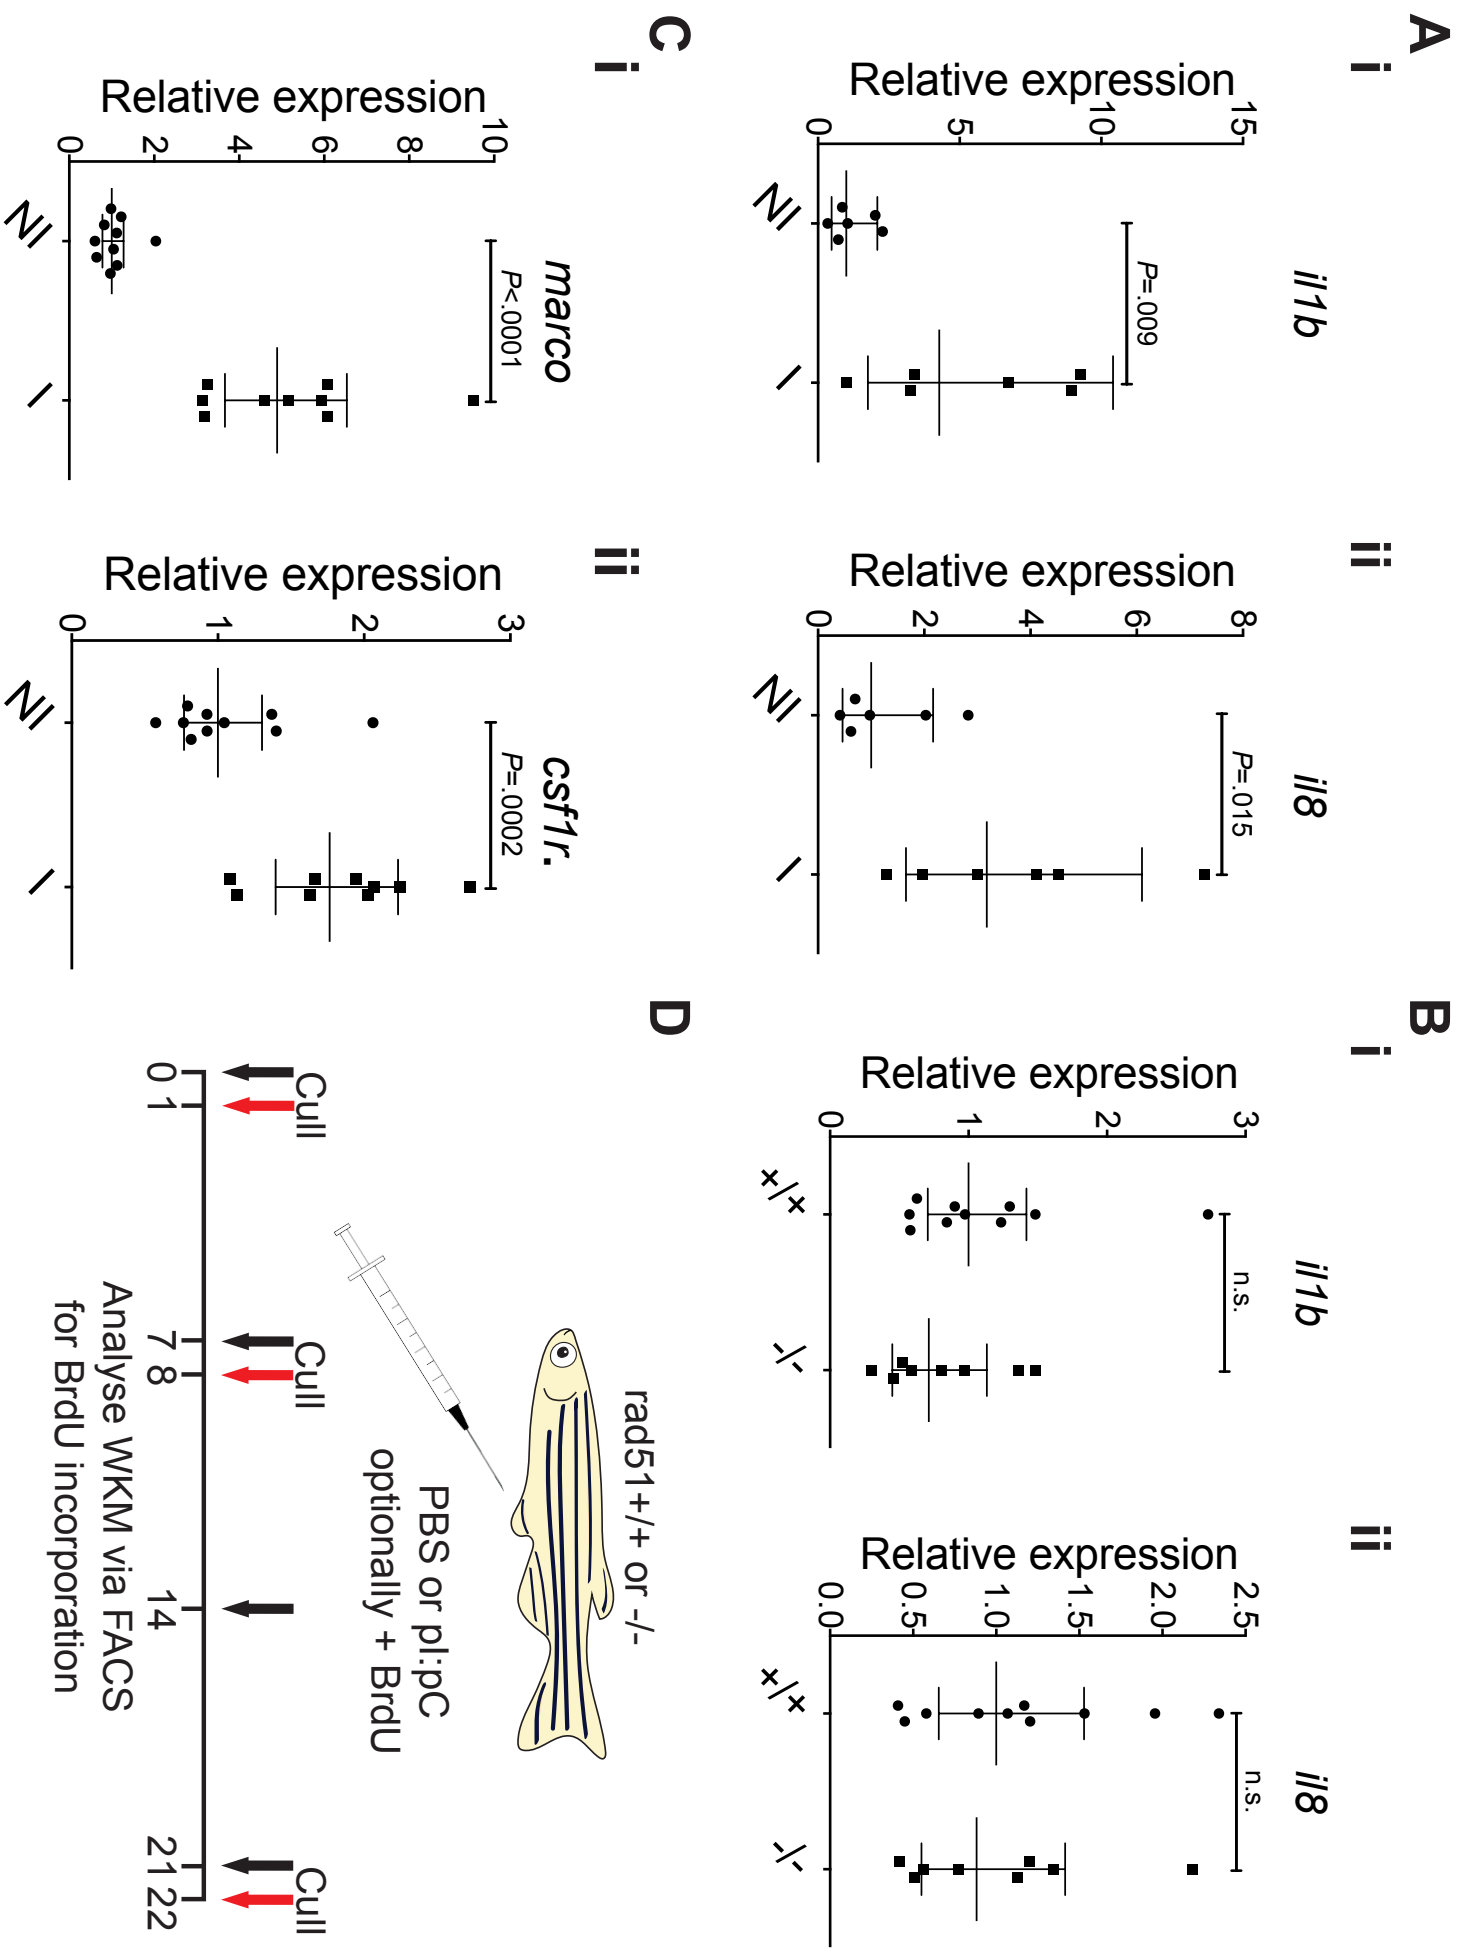

# Figure S9

## A

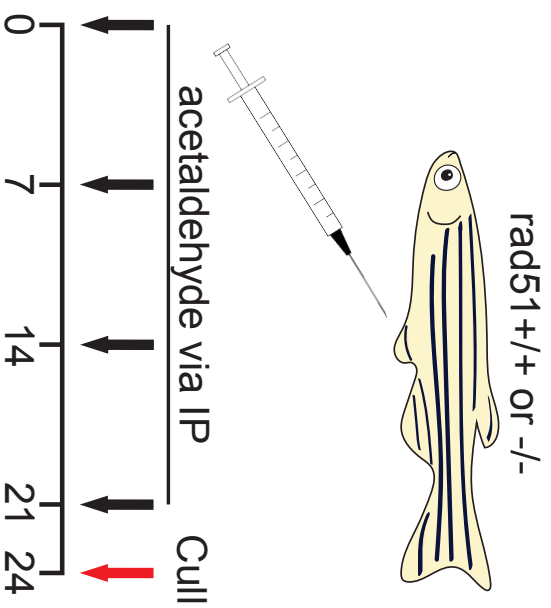

## B

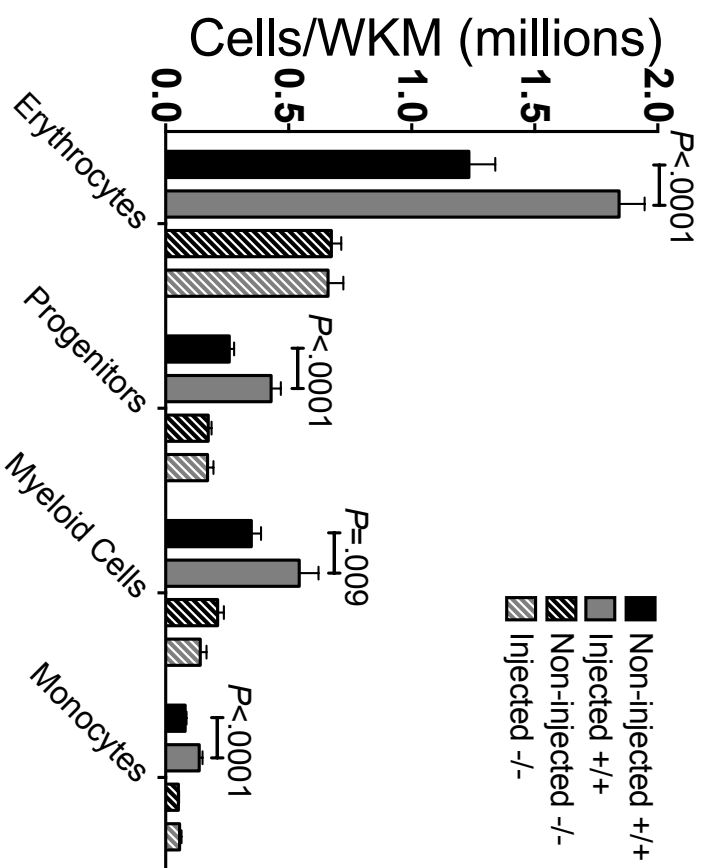

## C

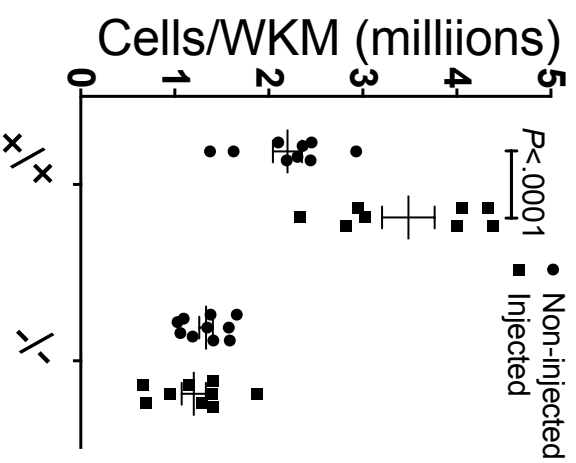

## D

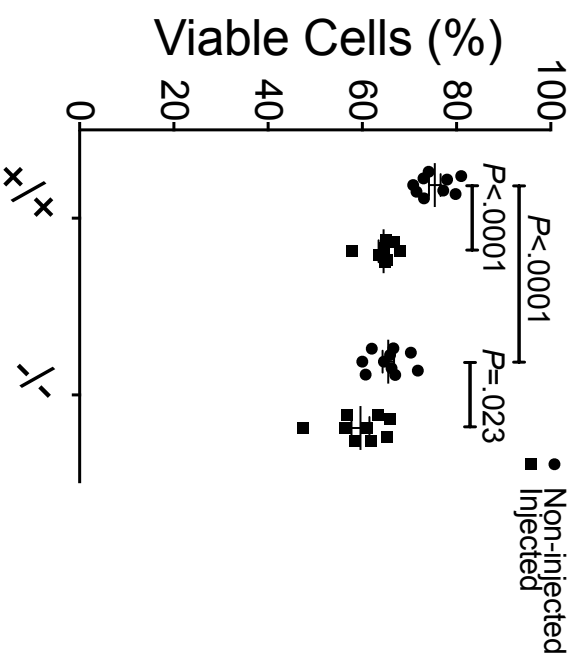

## E

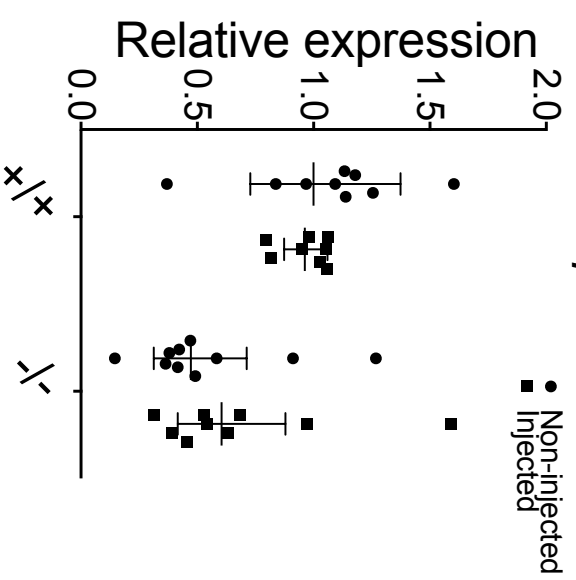

**Table S1**

| <b>Target</b> | <b>Species</b> | <b>Conjugate</b> | <b>Company</b>   | <b>Catalog No</b> | <b>Dilution used</b>    |
|---------------|----------------|------------------|------------------|-------------------|-------------------------|
| Rad51         | rabbit         | none             | Abcam            | ab137323          | 1:1000 (WB), 1:200 (IS) |
| Rad51         | rabbit         | none             | Anaspec          | 55838             | 1:200                   |
| BrdU          | rabbit         | fluorescein      | Roche            | 11202693001       | 1:100                   |
| pH2AX         | rabbit         | none             | -                | -                 | 1:1000                  |
| Beta-actin    | mouse          | none             | Sigma Aldrich    | 012M4821          | 1:1000                  |
| Mouse IgG     | rabbit         | HRP              | Abcam            | ab97046           | 1:50000                 |
| Rabbit IgG    | goat           | HRP              | Molecular Probes | G21234            | 1:50000                 |

**Table S2**

| <b>Target</b> | <b>Use</b> | <b>Forward</b>        | <b>Reverse</b>         | <b>Reference</b> |
|---------------|------------|-----------------------|------------------------|------------------|
| <i>il1b</i>   | qPCR       | GCTGGAGATCCAAACGGATA  | ATACGCGGTGCTGATAAACC   | [1]              |
| <i>il8</i>    | qPCR       | GTCGCTGCATTGAAACAGAA  | AGGGGTCCAGACAGATCTCC   | [1]              |
| <i>csf1r</i>  | qPCR       | ATGACCATACCCAACCTTCC  | AGTTTGTTGGTCTGGATGTG   | [2]              |
| <i>marco</i>  | qPCR       | ACGACAGCTTCGATAATTTG  | AAAATACTGCTCTCGGTTCC   | [2]              |
| <i>p53</i>    | qPCR       | CGAGCCACTGCCATCTATAAG | TGCCCTCCACTCTTATCAAATG |                  |
| <i>p21</i>    | qPCR       | GTGTCAGGAAAAGCAGCAGA  | GACGCTTCTTGGCTTGGTAG   |                  |

Table S3

| Genotype         | Staining intensity |        |     |
|------------------|--------------------|--------|-----|
|                  | High               | Medium | Low |
| rad51+/+, p53+/+ | 5                  | 9      | 3   |
| rad51+/+, p53+/- | 13                 | 13     | 5   |
| rad51+/+, p53-/- | 5                  | 4      | 6   |
| rad51+/-, p53+/+ | 6                  | 8      | 12  |
| rad51+/-, p53+/- | 25                 | 17     | 17  |
| rad51+/-, p53-/- | 15                 | 14     | 7   |
| rad51-/-, p53+/+ | 1                  | 6      | 6   |
| rad51-/-, p53+/- | 4                  | 6      | 19  |
| rad51-/-, p53-/- | 6                  | 3      | 2   |

Unsuccessful genotyping 3

Successful genotyping 237

Pooled data from 3 separate clutches with 60 embryos each
